# Supplementary material for: Atomic layer deposition-triggered hierarchical core/shell stable bifunctional electrocatalysts for overall water splitting
Source: Royal Society of Chemistry journal article supplement (doi:10.1039/d1ta06566a), 2021-01-01
Supplement: d1ta06566a1.pdf [file d1ta06566a1.pdf]

## Supporting information for

### Atomic Layer Deposition-Triggered Hierarchical Core/Shell Stable Bifunctional Electrocatalysts for Overall Water Splitting

*T. Kavinkumar<sup>a</sup>, Selvaraj Seenivasan<sup>a</sup>, Hyeonjung Jung<sup>b</sup>, Jeong Woo Han<sup>b\*</sup> and Do-Heyoung Kim<sup>a\*</sup>*

<sup>a</sup>School of Chemical Engineering, Chonnam National University, 77 Yongbong-ro, Gwangju 61186, Republic of Korea.

<sup>b</sup>Department of Chemical Engineering, Pohang University of Science and Technology (POSTECH), Pohang 37673, South Korea.

\*Corresponding author's email: [kdhh@chonnam.ac.kr](mailto:kdhh@chonnam.ac.kr); [jwhan@postech.ac.kr](mailto:jwhan@postech.ac.kr)

Tel. (office): +82-62-530-1894

### Experimental section

The preparation of NiCo<sub>2</sub>O<sub>4</sub>, NiCo<sub>2</sub>O<sub>4</sub>/MoO<sub>2</sub>, NiCo<sub>2</sub>O<sub>4</sub>@ALD-NiO and NiCo<sub>2</sub>O<sub>4</sub>/MoO<sub>2</sub>@ALD-NiO heteronanostructures has been described in our previous report.<sup>1</sup>

#### *Electrochemical measurements*

A saturated calomel electrode (SCE), Pt foil, and as-fabricated samples on the nickel foam (NF) served as the reference, counter, and working electrodes, respectively in an electrochemical workstation (WonATech WBCS30000). Five milligrams of Pt/C (or RuO<sub>2</sub>) and 10 μL of Nafion were dispersed in 1 mL of a water/alcohol mixture solution (3:1) using ultrasonication to prepare

an ink. Finally, 50  $\mu\text{L}$  of the catalyst ink was coated on the NF followed by drying at 60  $^{\circ}\text{C}$ . Thereafter, LSV measurements were performed at 2  $\text{mV s}^{-1}$  in a 1 M KOH solution for the OER and HER. EIS measurements were conducted on a Parstat 3000 workstation (0.01 Hz to 100 kHz at an amplitude of 10 mV). A gas chromatography system (074-594-P1E Micro GC Fusion, INFICON) was used to estimate the amounts of the gaseous products. All potentials were calibrated to the RHE using Eq 1.  $\eta$  was obtained using Eq 2, and the Tafel slope was obtained using Eq 3:

$$E_{\text{RHE}} = E_{\text{SCE}} + 0.059\text{pH} + 0.197 \quad (1)$$

$$\eta = E_{\text{RHE}} - 1.23 \quad (2)$$

$$\eta = b \log j + a \quad (3)$$

### ***Computational details***

All the DFT calculations were carried out using the Vienna Ab initio Simulation Package (VASP) <sup>2, 3</sup>. The Perdew–Burke–Ernzerhof exchange–correlation functional and the projector augmented wave pseudopotential were adopted with spin-polarization. During structural optimization, the convergence criterion of the total energy was set to  $10^{-4}$  eV, and the atoms were relaxed until the force acting on each atom was less than 0.03 eV/Å <sup>4, 5</sup>. A plane-wave cutoff energy of 400 eV was used in all computations. Brillouin zone sampling was conducted with  $6 \times 6 \times 6$ ,  $4 \times 4 \times 1$ , and  $4 \times 4 \times 1$  Monkhorst-Pack grids for the MoO<sub>2</sub> bulk, MoO<sub>2</sub> slab, and MoO<sub>2</sub>@ALD-NiO slab model calculations, respectively <sup>6</sup>. The (-111) facet is typically studied in monoclinic MoO<sub>2</sub> systems, whereas the (100) facet is the most stable NiO surface <sup>7-10</sup>. Therefore, the most stable MoO<sub>2</sub> (-111) termination was investigated for the NiCo<sub>2</sub>O<sub>4</sub>/MoO<sub>2</sub>

surface, and four NiO (100) layers were loaded onto it to represent the NiCo<sub>2</sub>O<sub>4</sub>/MoO<sub>2</sub>@ALD-NiO surface (Figure S11). The lattice misfit between MoO<sub>2</sub> and NiO was calculated as follows:

$$f = \left| \frac{l_{\text{MoO}_2} - l_{\text{NiO}}}{l_{\text{MoO}_2}} \right|,$$

where  $l$  is the length of one side. The two bottom layers of the four MoO<sub>2</sub> layers were fixed in all slab models, and each slab model was separated from its neighbors by a sufficiently thick vacuum layer spacing. The Gibbs free energies of the alkaline OER and HER were calculated by correcting the DFT energy using the zero-point energy ( $ZPE$ ) and entropy as follows:

$$\Delta G = \Delta E + \Delta ZPE - T\Delta S,$$

where  $E$  is the DFT-calculated total energy,  $ZPE$  is the zero-point energy,  $T$  is the environment temperature, and  $S$  is the entropy. The vibrational frequencies for the  $ZPE$  correction and entropy calculations were calculated by employing the density-functional perturbation theory.

The band center was calculated as follows:

$$M_d \text{ or } O_p = \frac{\int_{-\infty}^{E_f} E \cdot \rho(E) dE}{\int_{-\infty}^{E_f} \rho(E) dE},$$

where  $E_f$  is the Fermi-level energy,  $E$  is the energy relative to the Fermi level, and  $\rho$  represents the density of state in corresponding orbital.

### ***Characterization***

XRD patterns were collected from 10° to 80° using an X-ray diffractometer (PANalytical) employing Cu K $\alpha$  radiation. FE-SEM and TEM were performed using the JEOL JSM-7500F and a Tecnai G2 F20, respectively. The oxidation states of the catalysts were determined using XPS (ESCALAB-MKII (VG Scientific Co.)).

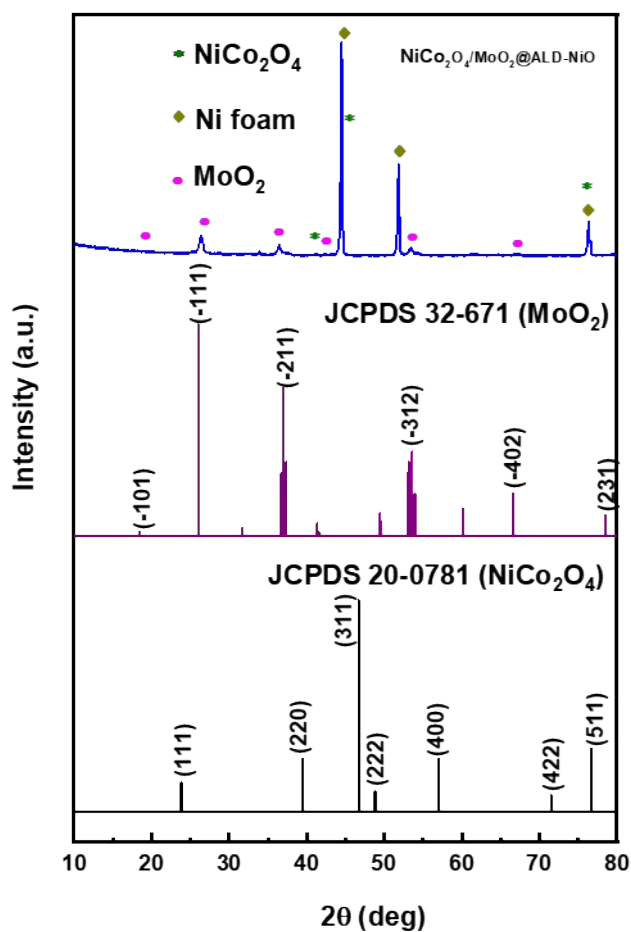

**Figure S1.** Powder XRD pattern of the NiCo<sub>2</sub>O<sub>4</sub>/MoO<sub>2</sub>@ALD-NiO heteronanostructure.

Reproduced with permission.<sup>1</sup>

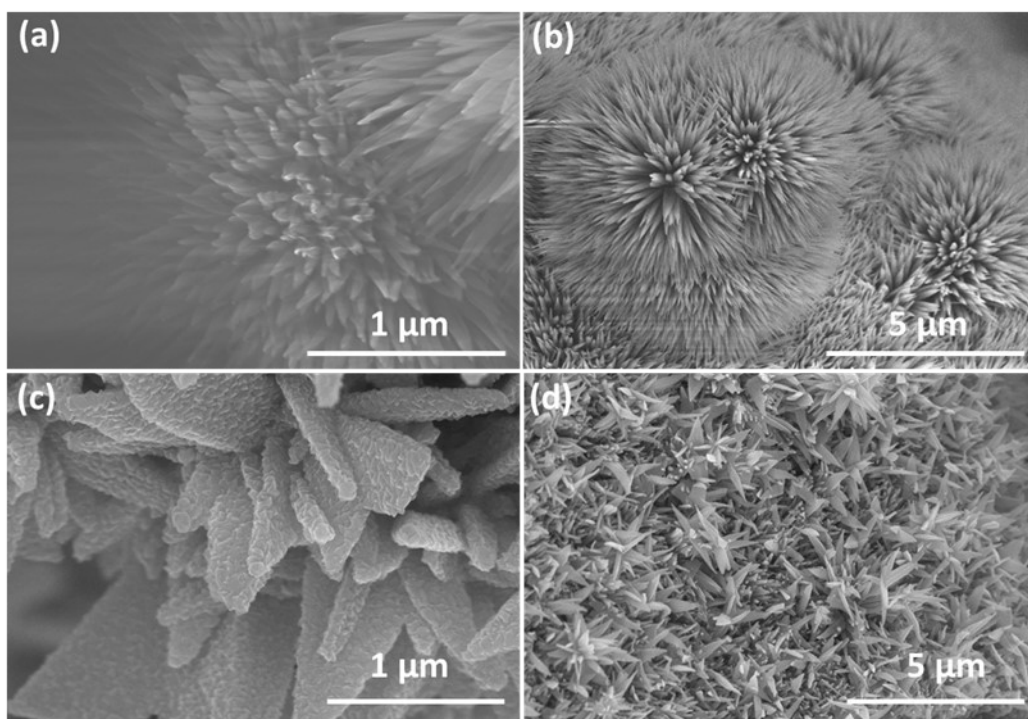

**Figure S2.** FE-SEM images of (a, b) pristine  $\text{NiCo}_2\text{O}_4$ , and the (c, d)  $\text{NiCo}_2\text{O}_4/\text{MoO}_2$  core/shell structure at different magnifications. Reproduced with permission.<sup>1</sup>

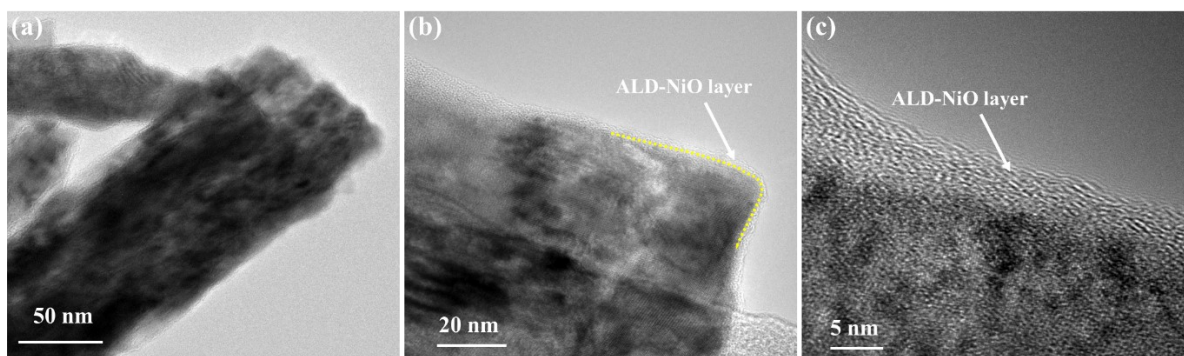

**Figure S3.** TEM images of NiCo<sub>2</sub>O<sub>4</sub>@ALD-NiO at different magnifications.

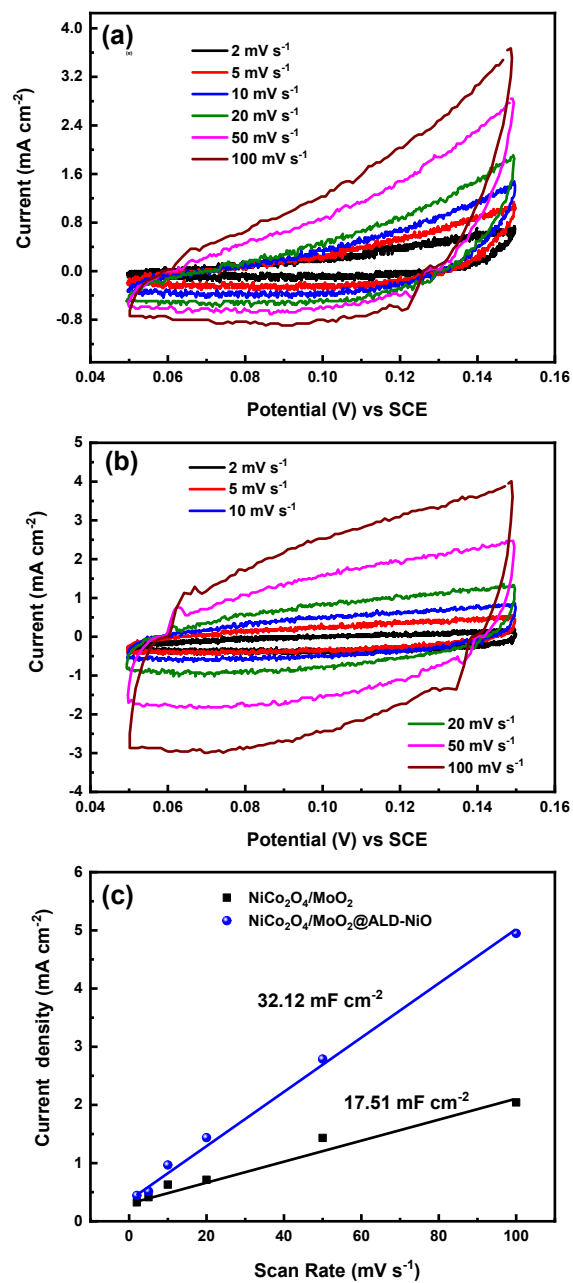

**Figure S4.** Cyclic voltammograms in the potential range 50–150 mV for (a)  $\text{NiCo}_2\text{O}_4/\text{MoO}_2$  and (b) the  $\text{NiCo}_2\text{O}_4/\text{MoO}_2@\text{ALD-NiO}$  heteronanostructures at different sweep rates. (c) Current density vs. sweep rate of the as-prepared electrocatalysts for measuring  $C_{dl}$ .

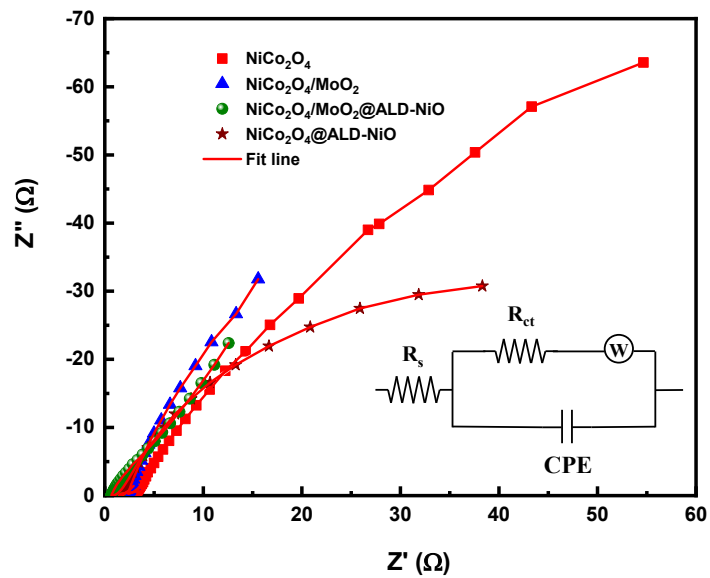

**Figure S5.** Nyquist plots corresponding to various catalysts in 1 M KOH.



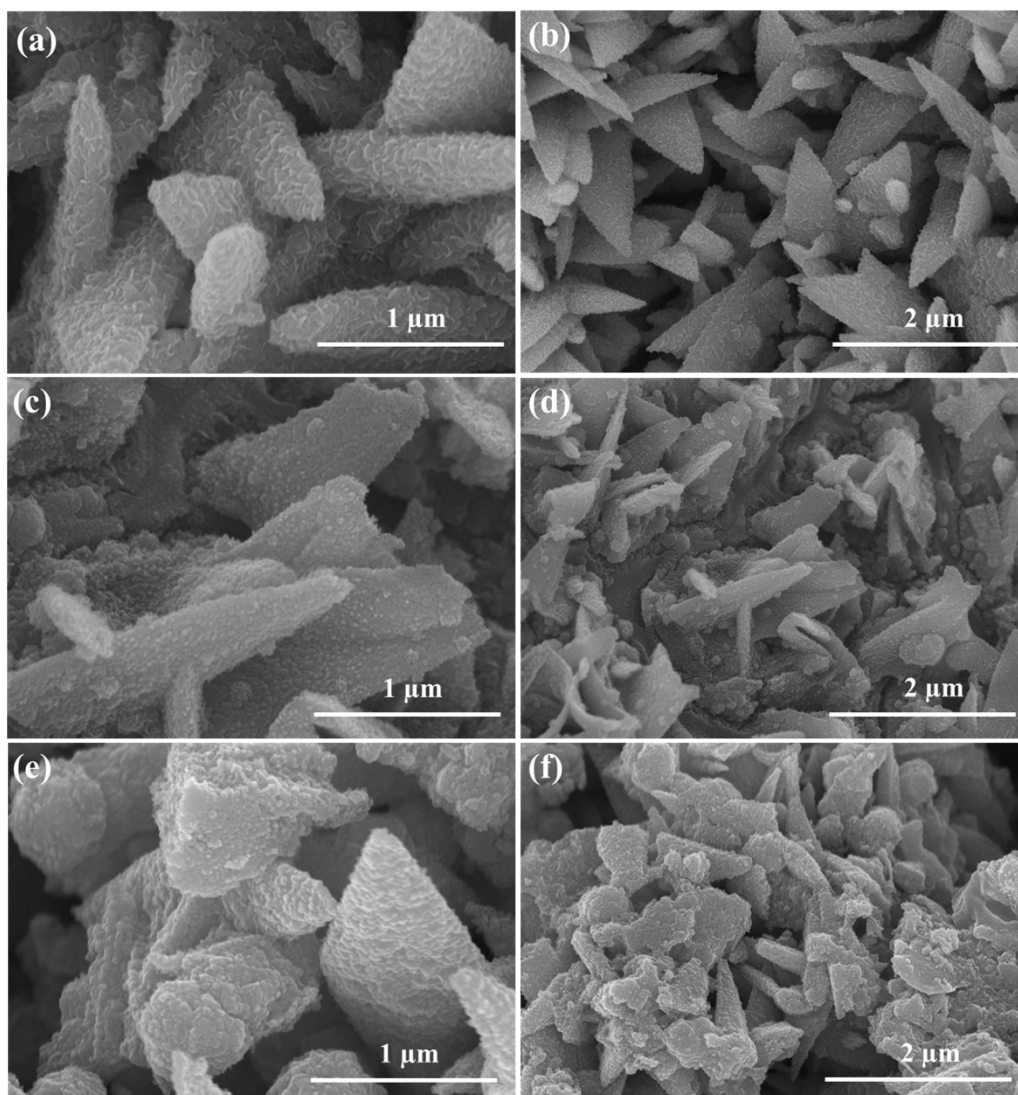

**Figure S6.** FE-SEM images of the  $\text{NiCo}_2\text{O}_4/\text{MoO}_2@\text{ALD-NiO}$  heteronanostructure (a, b) before, (c, d) after the 100 h OER, and (e, f) after the 100 h HER.

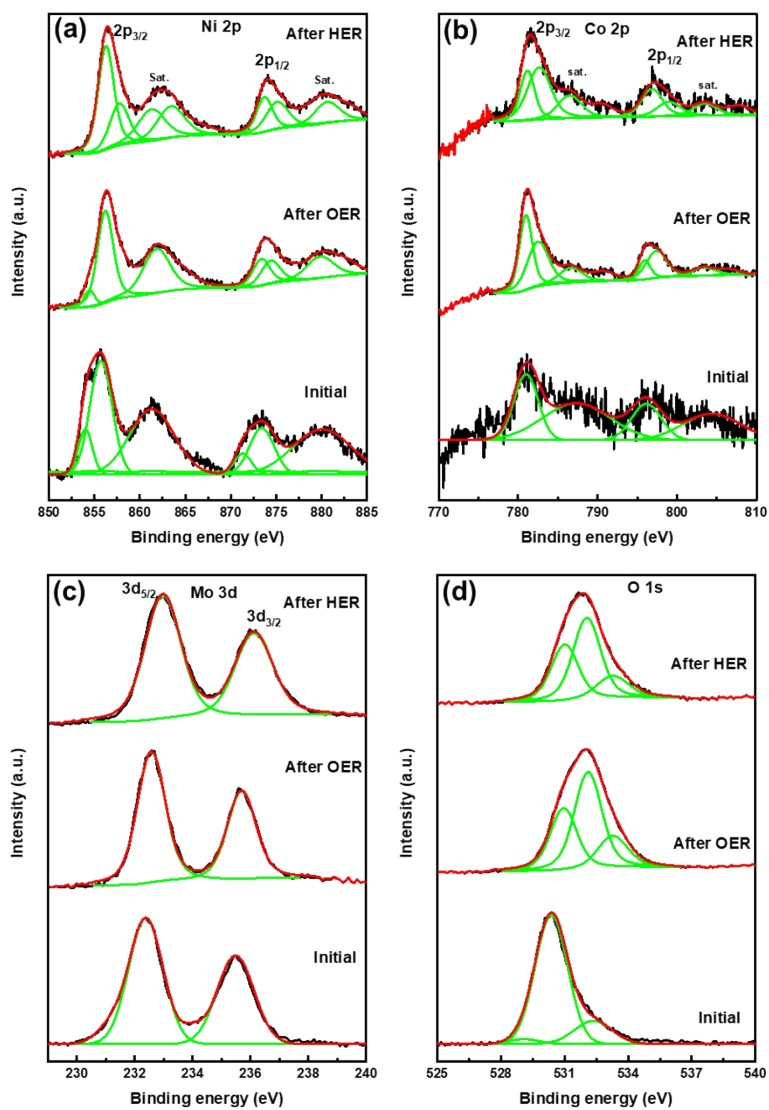

**Figure S7.** XPS spectra of the NiCo<sub>2</sub>O<sub>4</sub>/MoO<sub>2</sub>@ALD-NiO heteronanostructure before and after 100 h of the OER/HER.

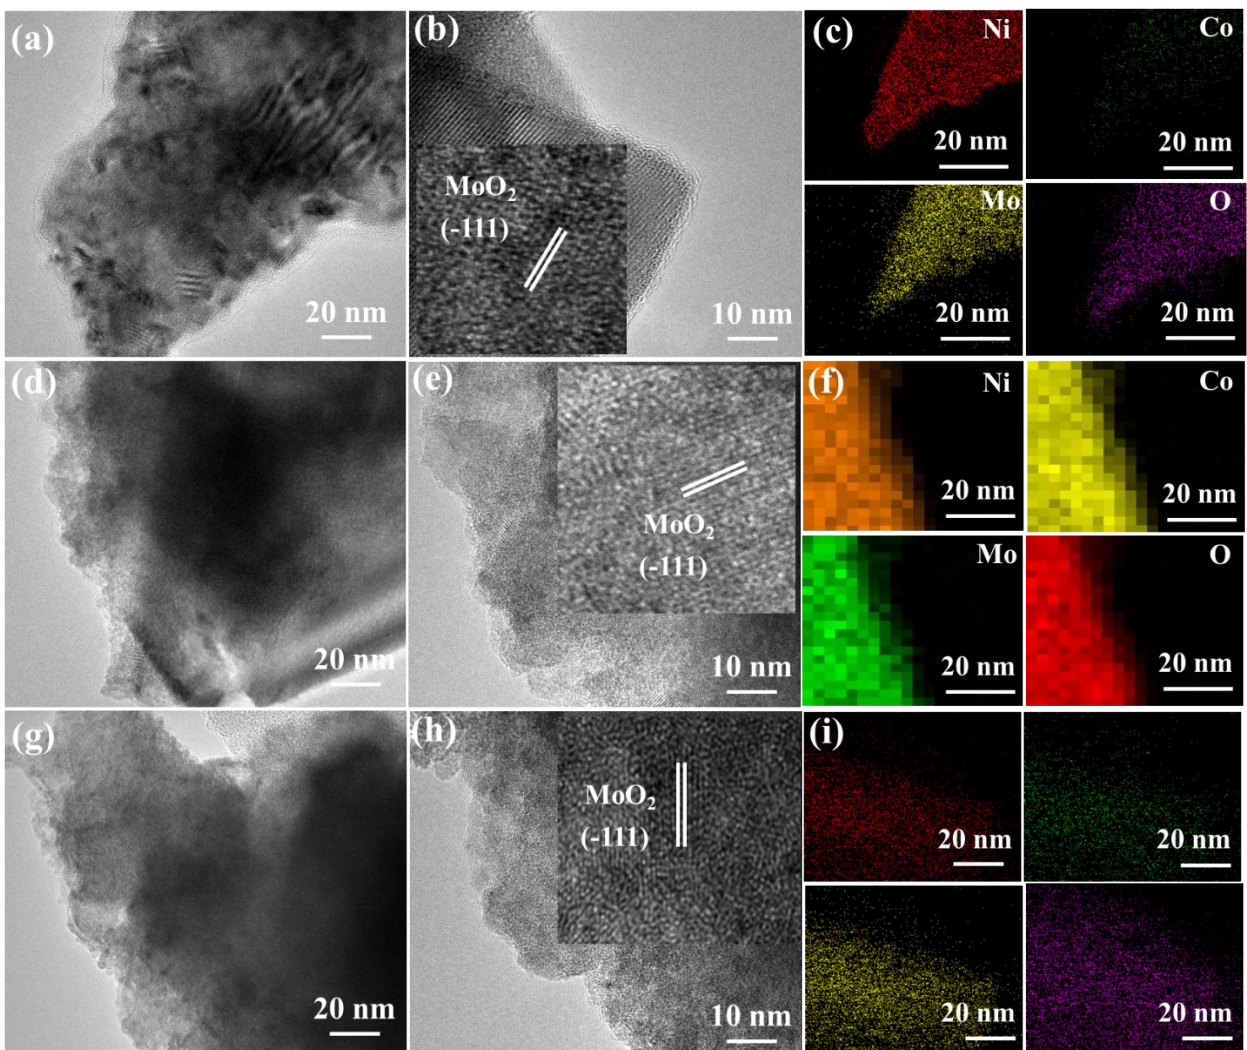

**Figure S8.** TEM, HR-TEM, and elemental mapping results for the NiCo<sub>2</sub>O<sub>4</sub>/MoO<sub>2</sub>@ALD-NiO heteronanostructure: (a–c) before, (d–f) after the OER, and (g–i) after the HER.

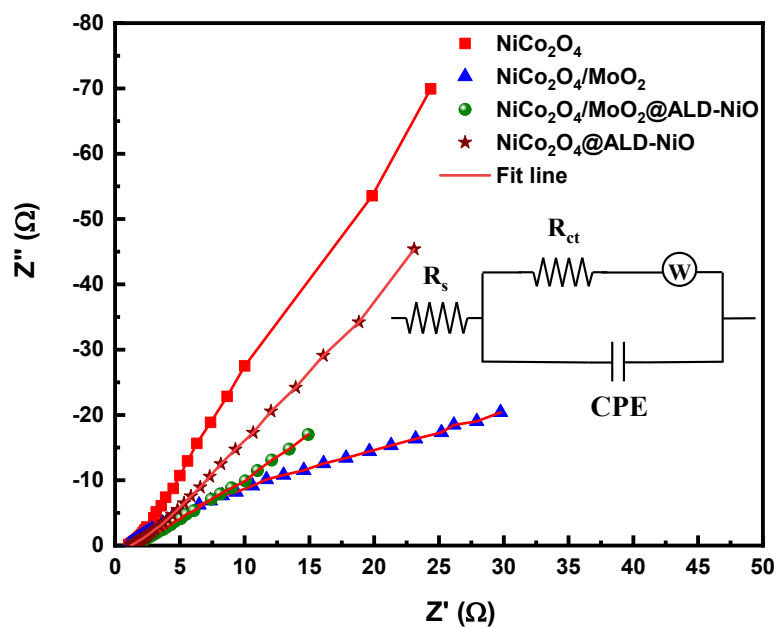

**Figure S9.** Nyquist plots corresponding to various catalysts in 1 M KOH.

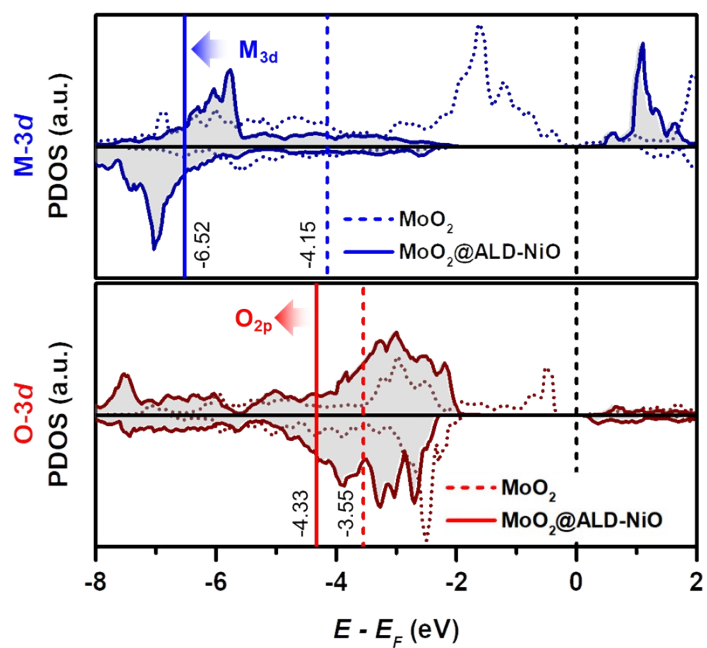

**Figure S10.** Partial density of states and band centers of the (a) active-metal 3d orbital and (b) active-oxygen 2p orbital. The Fermi level is set to zero.

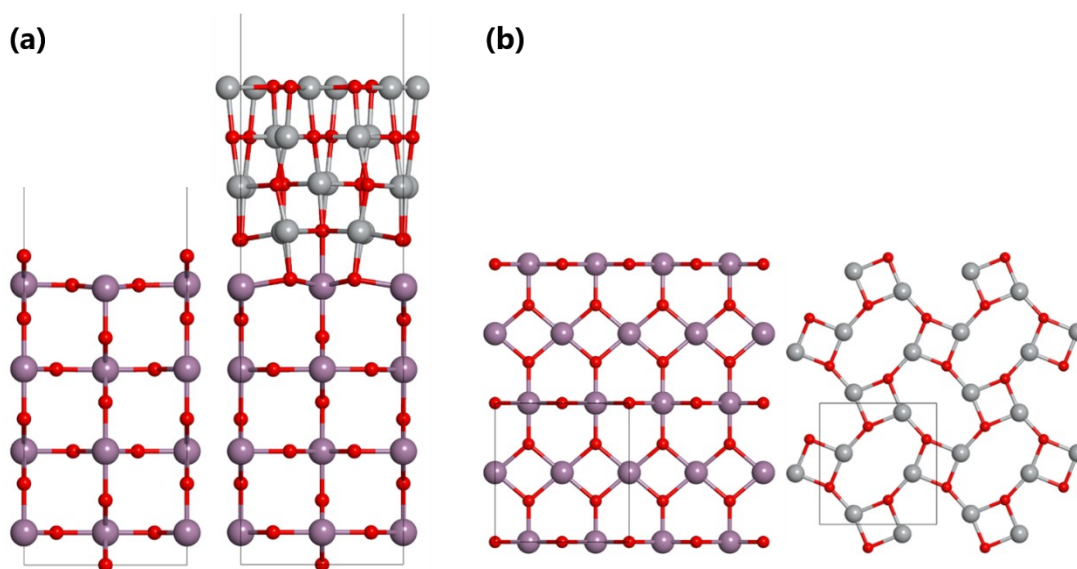

**Figure S11.** (a) Side and (b) top views of MoO<sub>2</sub> and MoO<sub>2</sub>@ALD-NiO slab models, respectively.

The solid black line represents one unit cell area.

**Table S1.** Comparison of the OER performance of the NiCo<sub>2</sub>O<sub>4</sub>/MoO<sub>2</sub>@ALD-NiO heteronanostructure with that of previously reported electrocatalysts.

| Catalyst                                                                         | Electrolyte | Overpotential at 100 mA cm <sup>-2</sup> (mV) | Tafel slope (mV dec <sup>-1</sup> ) | Ref.                |
|----------------------------------------------------------------------------------|-------------|-----------------------------------------------|-------------------------------------|---------------------|
| NiCo <sub>2</sub> O <sub>4</sub> @CoMoO <sub>4</sub>                             | 1 M KOH     | ~490                                          | -                                   | 11                  |
| VCNB/NF                                                                          | 1 M KOH     | 370                                           | -                                   | 12                  |
| NiCo <sub>2</sub> S <sub>2</sub> NW                                              | 1 M KOH     | 370                                           | 40                                  | 13                  |
| Ni <sub>2</sub> P@NF-6                                                           | 1 M KOH     | 590                                           | 297                                 | 14                  |
| Ni@Co-Ni-P                                                                       | 1 M KOH     | 380                                           | 65                                  | 15                  |
| Ultrathin Co <sub>3</sub> O <sub>4</sub> nanosheets                              | 1 M KOH     | 535                                           | 49.1                                | 16                  |
| NiCoP/C                                                                          | 1 M KOH     | 430                                           | 96                                  | 17                  |
| Co <sub>3</sub> O <sub>4</sub> /NiCo <sub>2</sub> O <sub>4</sub>                 | 1 M KOH     | 495                                           | 88                                  | 18                  |
| NiFe-LDH                                                                         | 1 M NaOH    | 450                                           | -                                   | 19                  |
| Co <sub>3</sub> O <sub>4</sub> NWs                                               | 1 M KOH     | 468                                           | 95.0                                | 20                  |
| <b>NiCo<sub>2</sub>O<sub>4</sub>/MoO<sub>2</sub>@ALD-NiO heteronanostructure</b> | 1 M KOH     | <b>372.3</b>                                  | <b>57.0</b>                         | <b>Present work</b> |

**Table S2.** Comparison of the HER performance of the NiCo<sub>2</sub>O<sub>4</sub>/MoO<sub>2</sub>@ALD-NiO heteronanostructure with that of previously reported electrocatalysts.

| Catalyst                                                                         | Electrolyte | Overpotential at 10 mA cm <sup>-2</sup> (mV) | Tafel slope (mV dec <sup>-1</sup> ) | Ref.                |
|----------------------------------------------------------------------------------|-------------|----------------------------------------------|-------------------------------------|---------------------|
| NiCo <sub>2</sub> O <sub>4</sub> @CoMoO <sub>4</sub>                             | 1 M KOH     | 121                                          | 77.0                                | 11                  |
| Ni-Co-P                                                                          | 1 M KOH     | 107                                          | 46.0                                | 21                  |
| NiFe-LDH/NiCo <sub>2</sub> O <sub>4</sub>                                        | 1 M KOH     | 192                                          | 59.0                                | 22                  |
| Ni(OH) <sub>2</sub> @CuS                                                         | 1 M KOH     | 95                                           | 42.0                                | 23                  |
| H-Fe-CoMoS                                                                       | 1 M KOH     | 138                                          | 98.0                                | 24                  |
| NiCo <sub>2</sub> O <sub>4</sub> @Ni <sub>0.796</sub> CoLDH                      | 1 M KOH     | 115                                          | 56.4                                | 25                  |
| Ar-NiCo <sub>2</sub> O <sub>4</sub> /S                                           | 1 M KOH     | 137                                          | 121.4                               | 26                  |
| FeOOH/NiCo <sub>2</sub> O <sub>4</sub>                                           | 1 M KOH     | 146                                          | 41.3                                | 27                  |
| NiCo <sub>2</sub> O <sub>4</sub> /NiCoP                                          | 1 M KOH     | 198                                          | 91.0                                | 28                  |
| NiCo <sub>2</sub> O <sub>4</sub> LDH nanoflakes                                  | 1 M KOH     | 140                                          | 124.2                               | 29                  |
| NiCo <sub>2</sub> O <sub>4</sub> @NiMoO <sub>4</sub>                             | 1 M KOH     | 300                                          | 94.0                                | 30                  |
| <b>NiCo<sub>2</sub>O<sub>4</sub>/MoO<sub>2</sub>@ALD-NiO heteronanostructure</b> | 1 M KOH     | <b>57.1</b>                                  | <b>58.0</b>                         | <b>Present work</b> |



**Table S3.** Comparison of the water splitting performance of the NiCo<sub>2</sub>O<sub>4</sub>/MoO<sub>2</sub>@ALD-NiO heteronanostructure with that of previously reported electrocatalysts.

| Catalyst                                                                                      | Electrolyte    | Voltage (V)                           | Ref.                 |
|-----------------------------------------------------------------------------------------------|----------------|---------------------------------------|----------------------|
| NiFe/NiCo <sub>2</sub> O <sub>4</sub>                                                         | 1 M KOH        | 1.67 V @ 10 mA cm <sup>-2</sup>       | 31                   |
| Co-Fe oxyphosphide                                                                            | 1 M KOH        | 1.69 V @ 10 mA cm <sup>-2</sup>       | 32                   |
| NiFe HNSs                                                                                     | 1 M KOH        | 1.67 V @ 10 mA cm <sup>-2</sup>       | 33                   |
| NiS-Ni <sub>2</sub> P <sub>2</sub> S <sub>6</sub>                                             | 1 M KOH        | 1.64 V @ 10 mA cm <sup>-2</sup>       | 34                   |
| Ar-NiCo <sub>2</sub> O <sub>4</sub> /S                                                        | 1 M KOH        | 1.63 V @ 10 mA cm <sup>-2</sup>       | 26                   |
| NiCo <sub>2</sub> O <sub>4</sub> /NiCoP                                                       | 1 M KOH        | 1.66 V @ 10 mA cm <sup>-2</sup>       | 28                   |
| NiCo <sub>2</sub> O <sub>4</sub> /Ni <sub>0.33</sub> Co <sub>0.67</sub> S <sub>2</sub><br>NWs | 1 M KOH        | 1.73 V @ 10 mA cm <sup>-2</sup>       | 35                   |
| Ni/NiO                                                                                        | 1 M KOH        | 1.71 V @ 10 mA cm <sup>-2</sup>       | 36                   |
| Co <sub>x</sub> PO <sub>4</sub> /CoP                                                          | 1 M KOH        | 1.91 V @ 10 mA cm <sup>-2</sup>       | 37                   |
| Co <sub>9</sub> S <sub>8</sub> -CoSe <sub>2</sub>                                             | 1 M KOH        | 1.66 V @ 10 mA cm <sup>-2</sup>       | 38                   |
| MoP@Ni <sub>3</sub> P/NF                                                                      | 1 M KOH        | 1.67 V @ 10 mA cm <sup>-2</sup>       | 39                   |
| <b>NiCo<sub>2</sub>O<sub>4</sub>/MoO<sub>2</sub>@ALD-NiO<br/>heteronanostructure</b>          | <b>1 M KOH</b> | <b>1.62 V @ 10 mA cm<sup>-2</sup></b> | <b>This<br/>work</b> |

## References

1. T. Kavinkumar, S. Seenivasan, H. H. Lee, H. Jung, J. W. Han and D.-H. Kim, *Nano Energy*, 2021, **81**, 105667.
2. G. Kresse and J. Hafner, *Phys. Rev. B*, 1993, **47**, 558-561.
3. G. Kresse and J. Furthmüller, *Phys. Rev. B*, 1996, **54**, 11169-11186.
4. J. P. Perdew, K. Burke and M. Ernzerhof, *Phys. Rev. Lett.*, 1996, **77**, 3865-3868.
5. P. E. Blöchl, *Phys. Rev. B*, 1994, **50**, 17953-17979.
6. H. J. Monkhorst and J. D. Pack, *Phys. Rev. B*, 1976, **13**, 5188-5192.
7. K. Chen, X.-M. Zhang, X.-F. Yang, M.-G. Jiao, Z. Zhou, M.-H. Zhang, D.-H. Wang and X.-H. Bu, *Appl. Catal. B.*, 2018, **238**, 263-273.
8. H. H. Zhao, Z. Li, X. P. Dai, M. L. Cui, F. Nie, X. Zhang, Z. T. Ren, Z. H. Yang, Y. H. Gan, X. L. Yin, Y. Wang and W. Y. Song, *J. Mater. Chem. A*, 2020, **8**, 6732-6739.
9. P. W. Tasker and D. M. Duffy, *Surface Science*, 1984, **137**, 91-102.
10. B. C. Wang, J. Nisar and R. Ahuja, *ACS Appl. Mater. Interfaces*, 2012, **4**, 5691-5697.
11. Y. Q. Gong, Z. Yang, Y. Lin, J. L. Wang, H. L. Pan and Z. F. Xu, *J. Mater. Chem. A*, 2018, **6**, 16950-16958.
12. H. Han, Y. R. Hong, J. Woo, S. Mhin, K. M. Kim, J. Kwon, H. Choi, Y. C. Chung and T. Song, *Adv. Energy Mater.*, 2019, **9**, 1803799.
13. A. Sivanantham, P. Ganesan and S. Shanmugam, *Adv. Funct. Mater.*, 2016, **26**, 4661-4672.
14. J. L. Zheng, W. Zhou, T. Liu, S. J. Liu, C. B. Wang and L. Guo, *Nanoscale*, 2017, **9**, 4409-4418.
15. W. Li, X. F. Gao, X. G. Wang, D. H. Xiong, P. P. Huang, W. G. Song, X. Q. Bao and L. F. Liu, *J. Power Sources*, 2016, **330**, 156-166.

16. Z. Cai, Y. M. Bi, E. Y. Hu, W. Liu, N. Dwarica, Y. Tian, X. L. Li, Y. Kuang, Y. P. Li, X. Q. Yang, H. L. Wang and X. M. Sun, *Adv. Energy Mater.*, 2018, **8**, 1701694.
17. P. He, X. Y. Yu and X. W. Lou, *Angew. Chem. Int. Edit.*, 2017, **56**, 3897-3900.
18. H. Hu, B. Y. Guan, B. Y. Xia and X. W. Lou, *J. Am. Chem. Soc.*, 2015, **137**, 5590-5595.
19. J. S. Luo, J. H. Im, M. T. Mayer, M. Schreier, M. K. Nazeeruddin, N. G. Park, S. D. Tilley, H. J. Fan and M. Gratzel, *Science*, 2014, **345**, 1593-1596.
20. C. M. Zhang, F. Q. Zheng, Z. W. Zhang, D. Xiang, C. F. Cheng, Z. H. Zhuang, P. Li, X. K. Li and W. Chen, *J. Mater. Chem. A*, 2019, **7**, 9059-9067.
21. E. L. Hu, Y. F. Feng, J. W. Nai, D. Zhao, Y. Hu and X. W. Lou, *Energ. Environ. Sci.*, 2018, **11**, 872-880.
22. Z. Q. Wang, S. Zeng, W. H. Liu, X. W. Wang, Q. W. Li, Z. G. Zhao and F. X. Geng, *ACS Appl. Mater. Interfaces*, 2017, **9**, 1488-1495.
23. S. Q. Liu, H. R. Wen, Ying-Guo, Y. W. Zhu, X. Z. Fu, R. Sun and C. P. Wong, *Nano Energy*, 2018, **44**, 7-14.
24. Y. N. Guo, X. Zhou, J. Tang, S. Tanaka, Y. V. Kaneti, J. Na, B. Jiang, Y. Yamauchi, Y. S. Bando and Y. Sugahara, *Nano Energy*, 2020, **75**, 104913.
25. M. Li, L. Tao, X. Xiao, X. Jiang, M. Wang and Y. Shen, *ACS Sustain. Chem. Eng.*, 2019, **7**, 4784-4791.
26. J. H. Lin, Y. T. Yan, T. X. Xu, C. Q. Qu, J. Li, J. Cao, J. C. Feng and J. L. Qi, *J. Colloid. Interf. Sci.*, 2020, **560**, 34-39.
27. X. Cao, Y. Sang, L. Wang, G. Ding, R. Yu and B. Geng, *Nanoscale*, 2020, **12**, 19404-19412.
28. W. Jin, J. P. Chen, H. B. Wu, N. Zang, Q. W. Li, W. Q. Cai and Z. X. Wu, *Catal. Sci. Technol.*, 2020, **10**, 5559-5565.

29. L. B. Ma, Y. Hu, R. P. Chen, G. Y. Zhu, T. Chen, H. L. Lv, Y. R. Wang, J. Liang, H. X. Liu, C. Z. Yan, H. F. Zhu, Z. X. Tie, Z. Jin and J. Liu, *Nano Energy*, 2016, **24**, 139-147.
30. D. Cui, R. D. Zhao, J. Q. Dai, J. Xiang and F. F. Wu, *Dalton T.*, 2020, **49**, 9668-9679.
31. C. L. Xiao, Y. B. Li, X. Y. Lu and C. Zhao, *Adv. Funct. Mater.*, 2016, **26**, 3515-3523.
32. P. Zhang, X. F. Lu, J. W. Nai, S. Q. Zang and X. W. Lou, *Adv. Sci.*, 2019, **6**, 1900576.
33. X. H. Sun, Q. Shao, Y. C. Pi, J. Guo and X. Q. Huang, *J. Mater. Chem. A*, 2017, **5**, 7769-7775.
34. X. Y. Zhang, S. Zhang, J. Li and E. K. Wang, *J. Mater. Chem. A*, 2017, **5**, 22131-22136.
35. Z. Peng, D. S. Jia, A. M. Al-Enizi, A. A. Elzatahry and G. F. Zheng, *Adv. Energy Mater.*, 2015, **5**, 1402031.
36. H. Sun, Z. Ma, Y. Qiu, H. Liu and G.-g. Gao, *Small*, 2018, **14**, 1800294.
37. Y. Yang, H. L. Fei, G. D. Ruan and J. M. Tour, *Adv. Mater.*, 2015, **27**, 3175-3180.
38. S. Chakrabartty, S. Karmakar and C. R. Raj, *ACS Appl. Nano Mater.*, 2020, **3**, 11326-11334.
39. F. M. Wang, J. W. Chen, X. P. Qi, H. Yang, H. H. Jiang, Y. Q. Deng and T. X. Liang, *Appl. Surf. Sci.*, 2019, **481**, 1403-1411.
